# Supplementary material for: High-Throughput Identification of Calcium Regulated Proteins Across Diverse Proteomes
Source: PubMed Central journal article supplement — bioRxiv. 2024 Jan 22:2024.01.18.575273. Preprint. [Version 4] doi: 10.1101/2024.01.18.575273 (PMC10827220; doi:10.1101/2024.01.18.575273), 2024-01-22

## SUPPLEMENTAL FIGURE 1

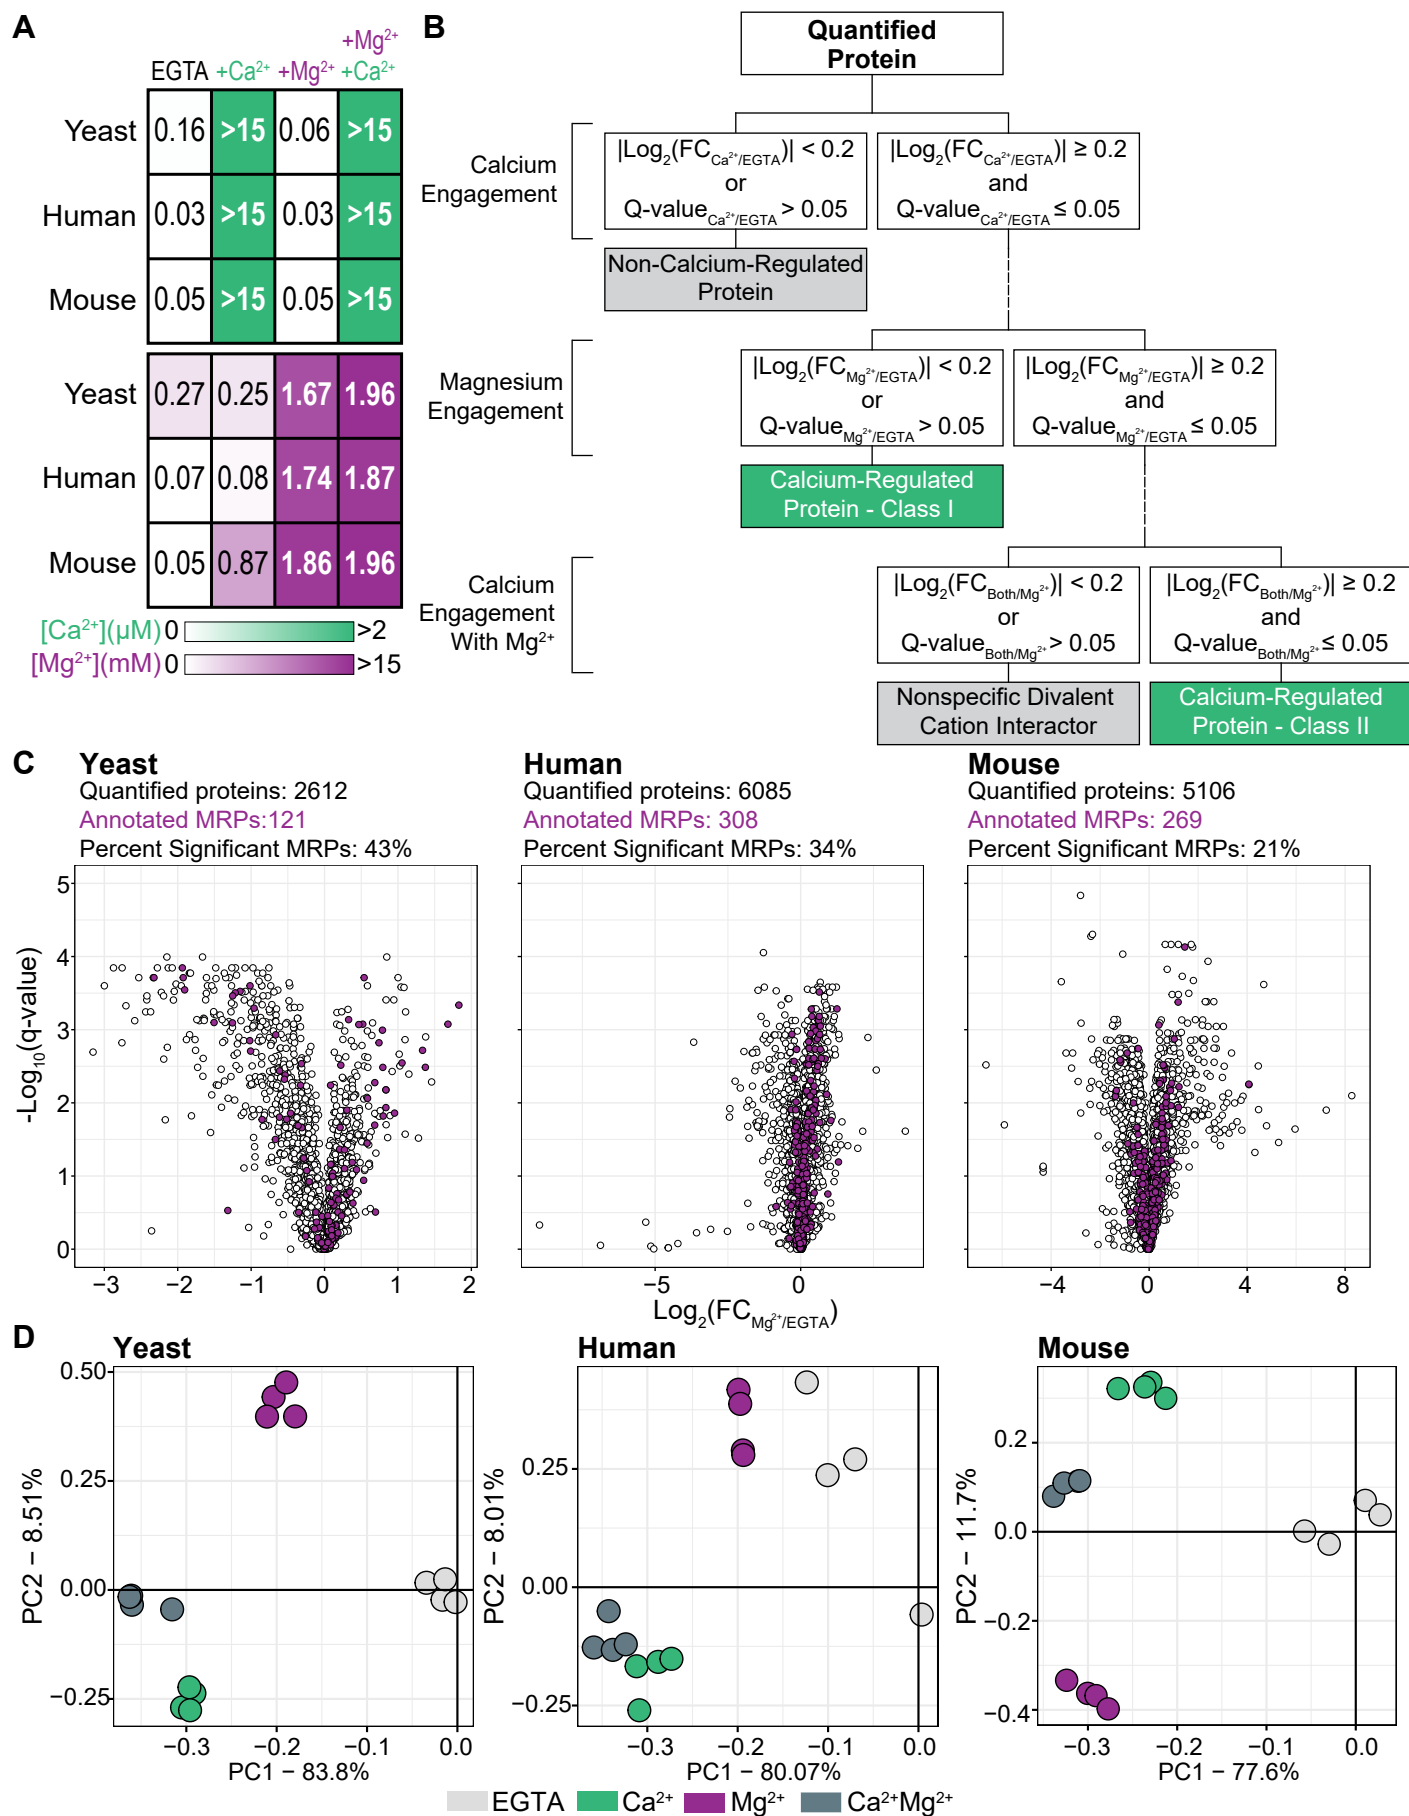

# SUPPLEMENTAL FIGURE 2

bioRxiv preprint doi: <https://doi.org/10.1101/2024.01.18.575273>; this version posted January 22, 2024. The copyright holder for this preprint (which was not certified by peer review) is the author/funder, who has granted bioRxiv a license to display the preprint in perpetuity. It is made available under aCC-BY-NC 4.0 International license.

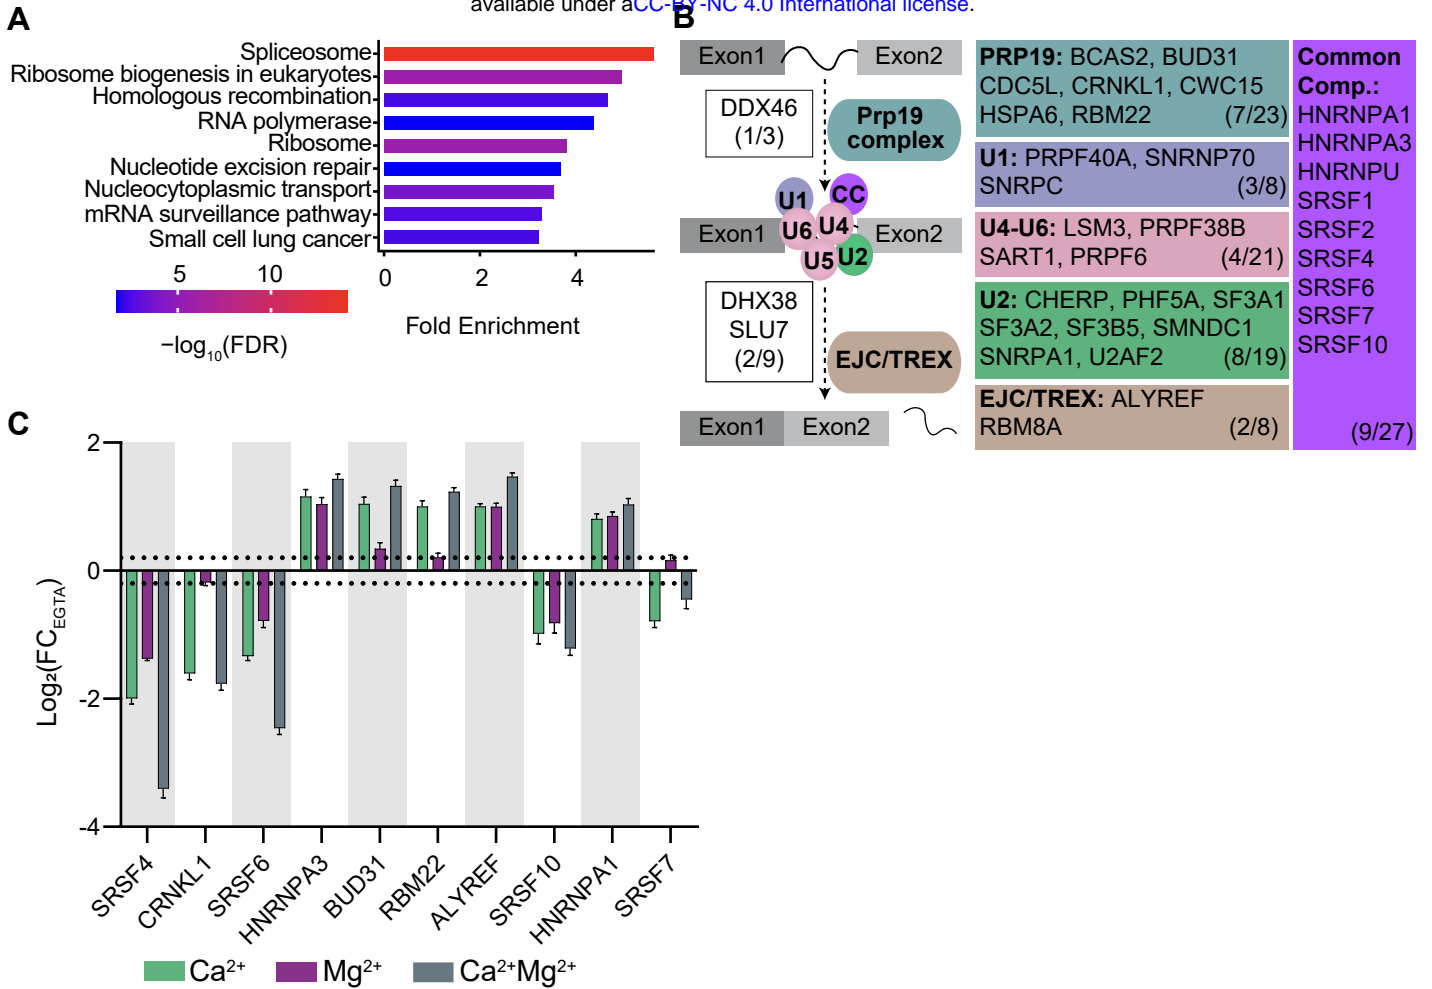

### SUPPLEMENTAL FIGURE 3

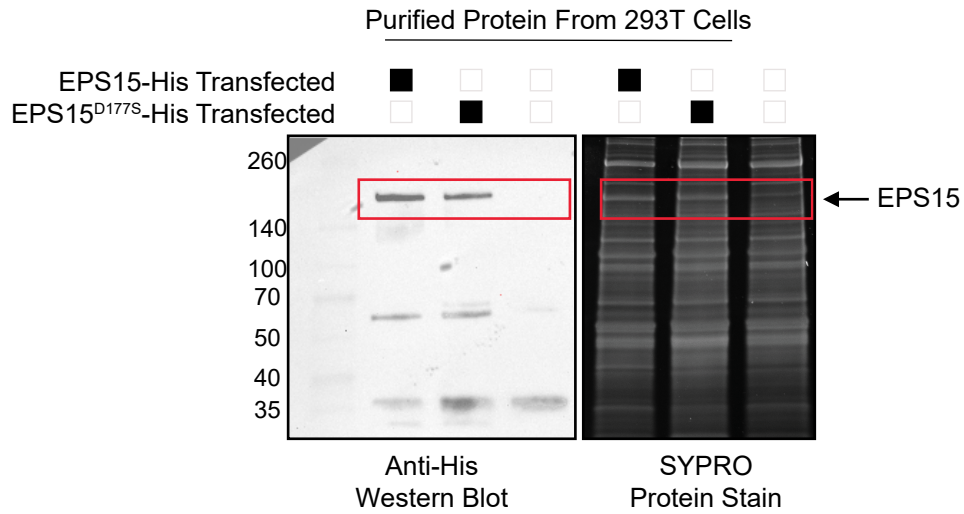

# SUPPLEMENTAL FIGURE 4

bioRxiv preprint doi: <https://doi.org/10.1101/2024.01.18.575273>; this version posted January 22, 2024. The copyright holder for this preprint (which was not certified by peer review) is the author/funder, who has granted bioRxiv a license to display the preprint in perpetuity. It is made available under aCC-BY-NC 4.0 International license.

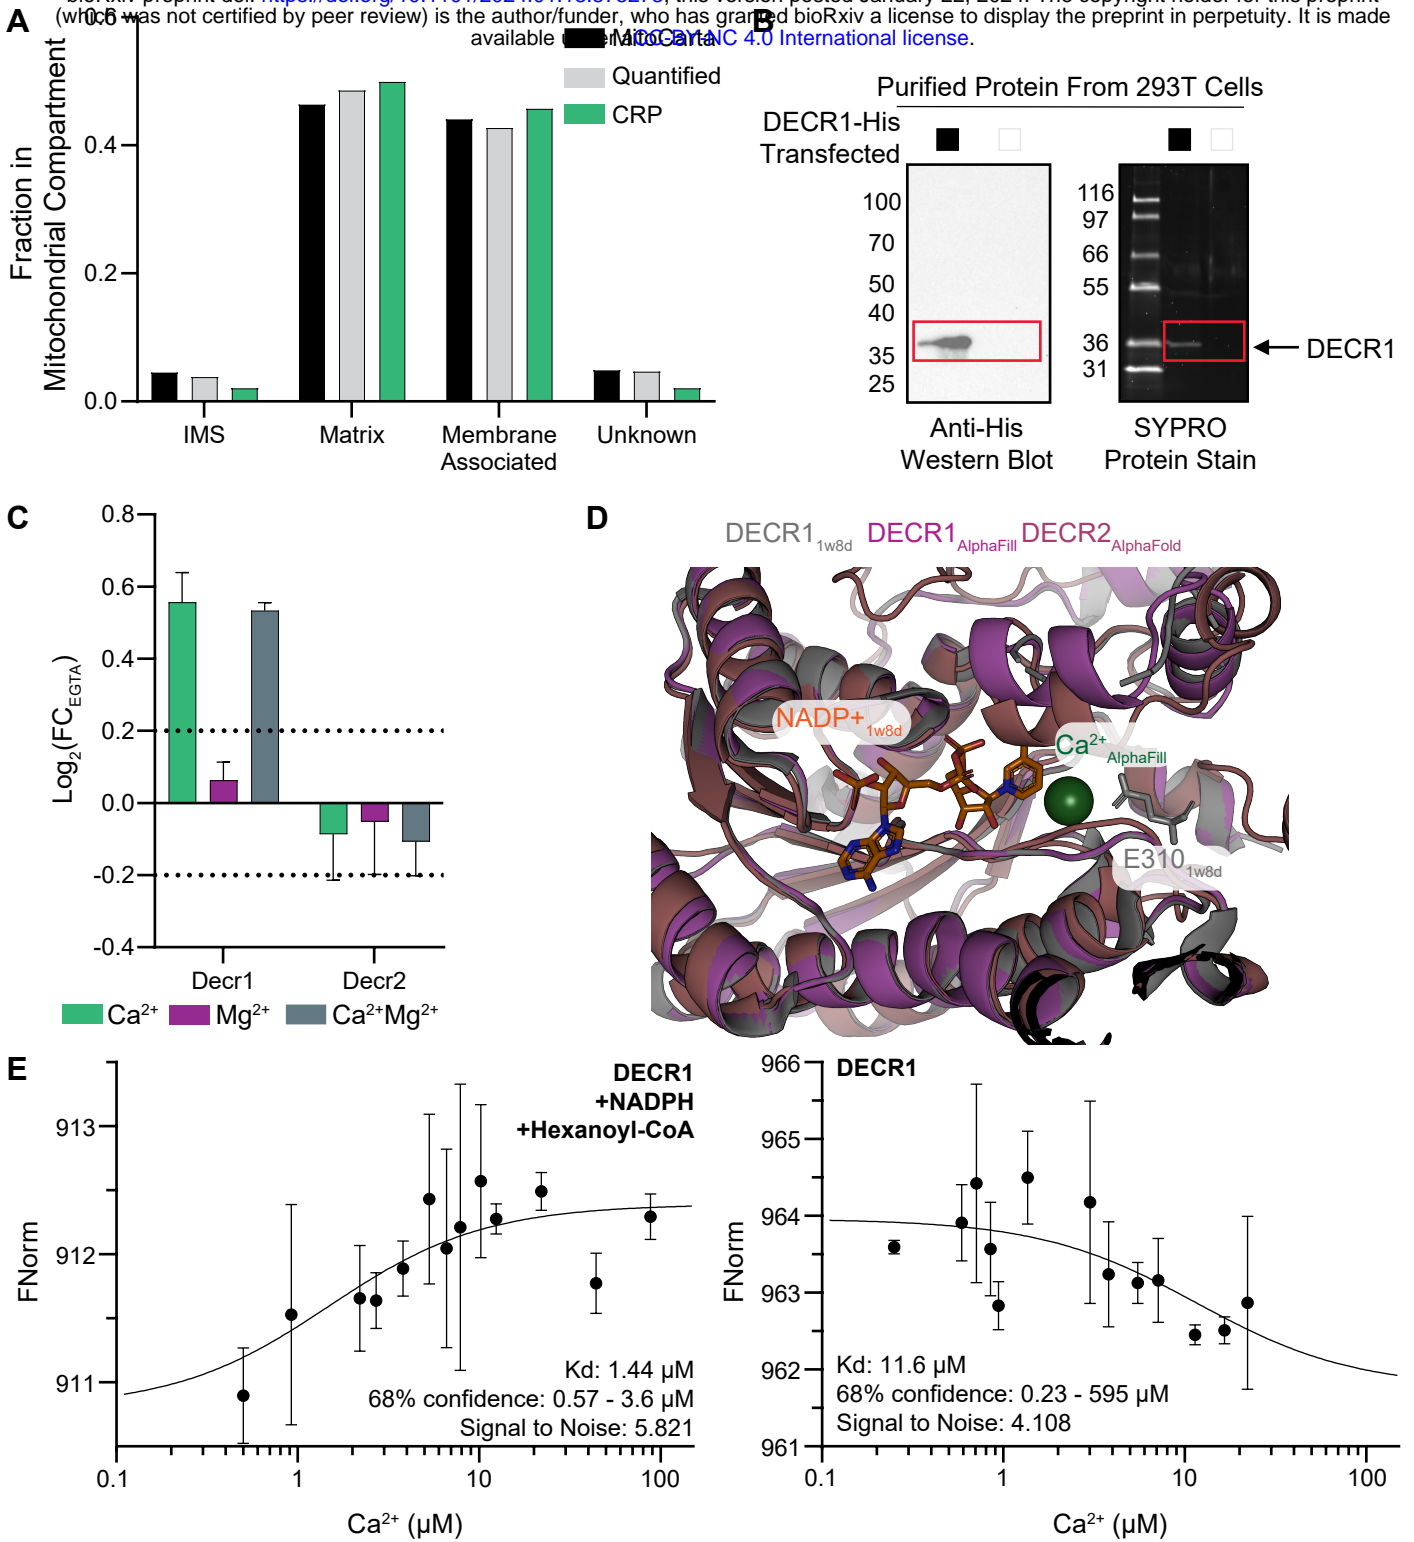

**SUPPLEMENTAL FIGURE 5**

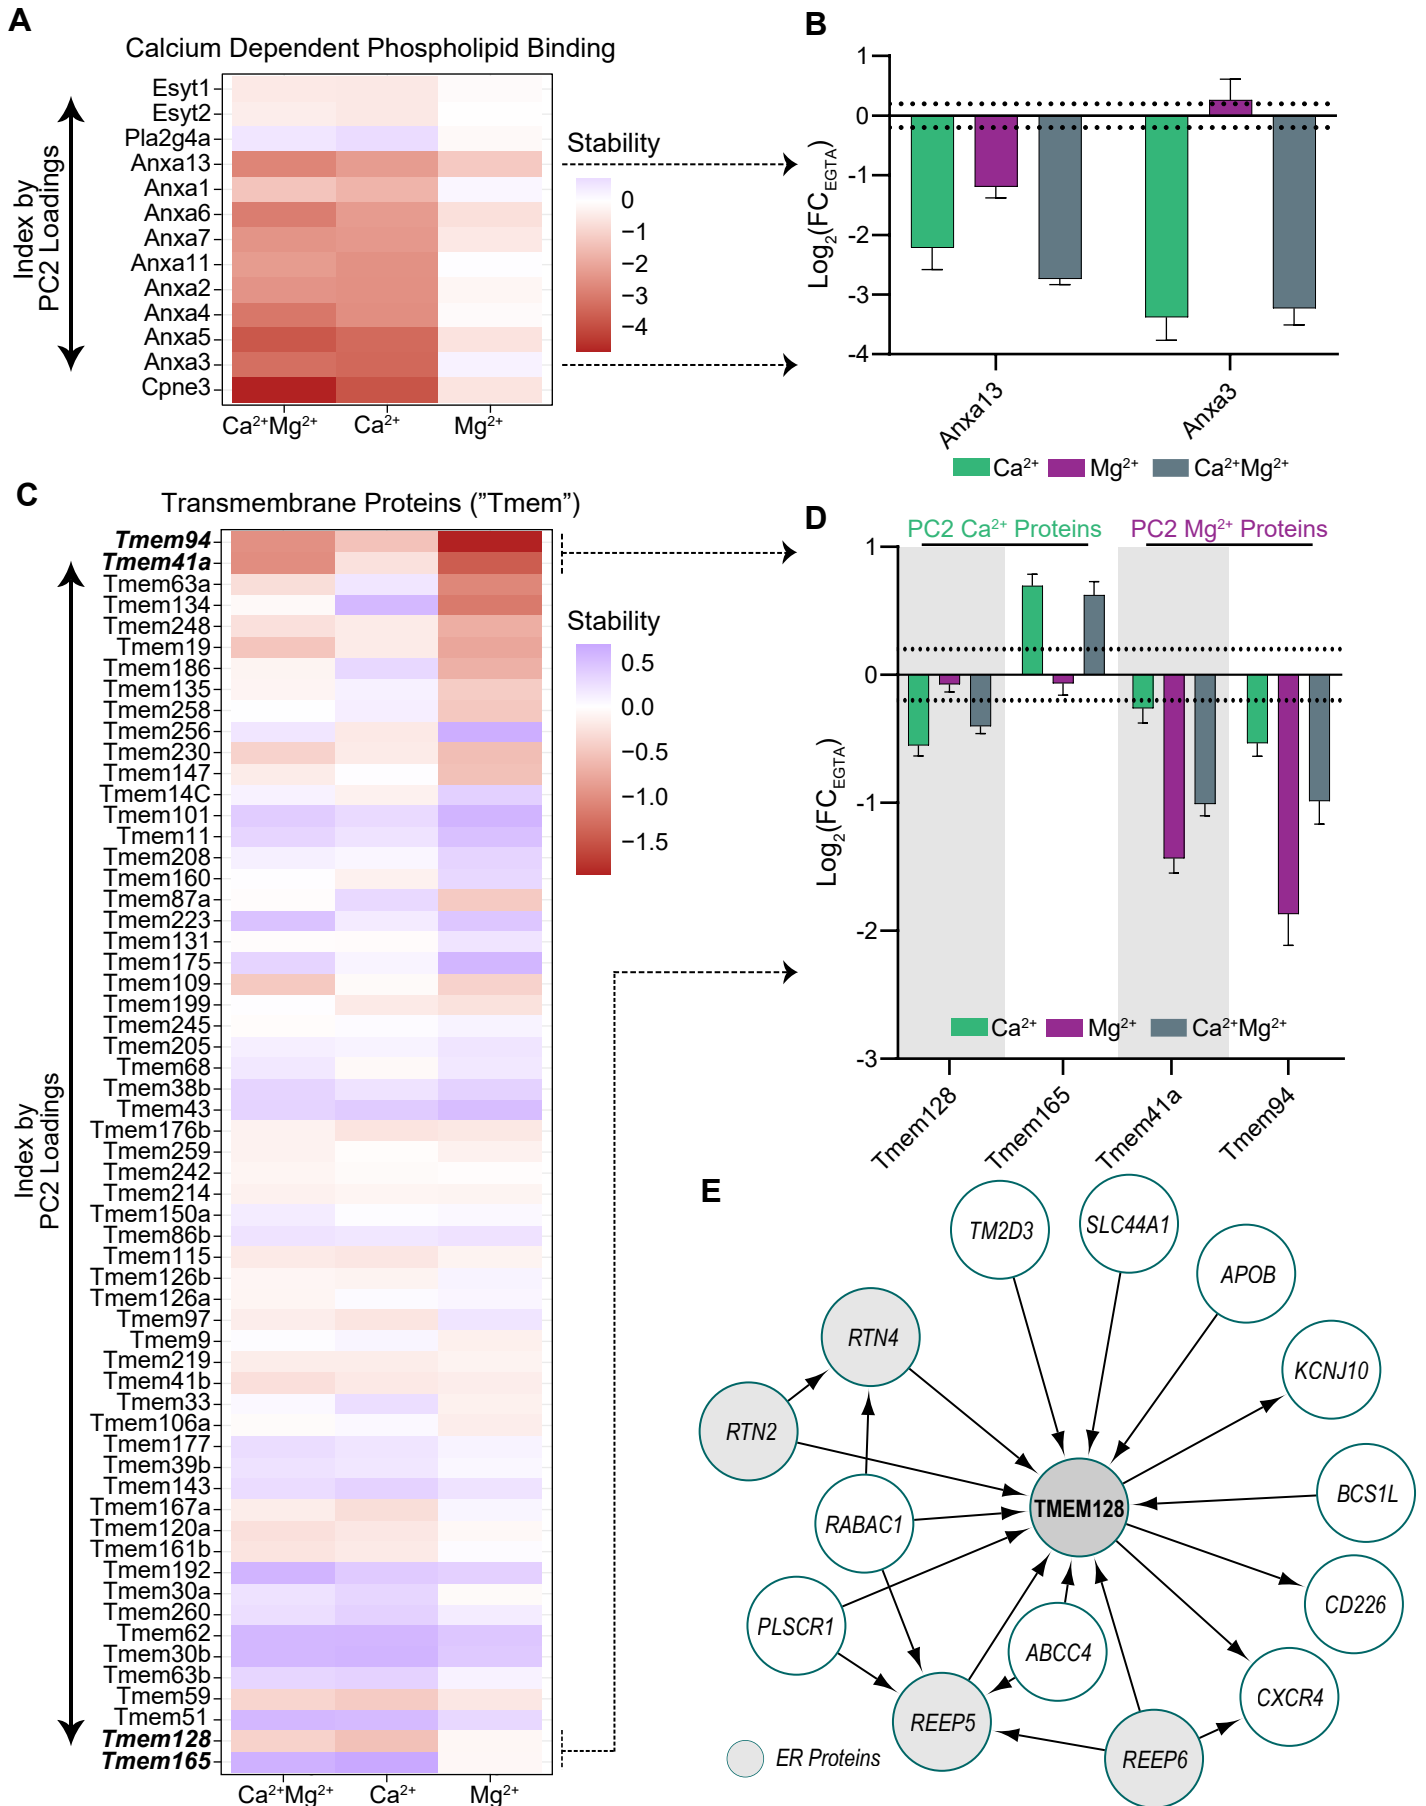

## SUPPLEMENTAL FIGURE 6

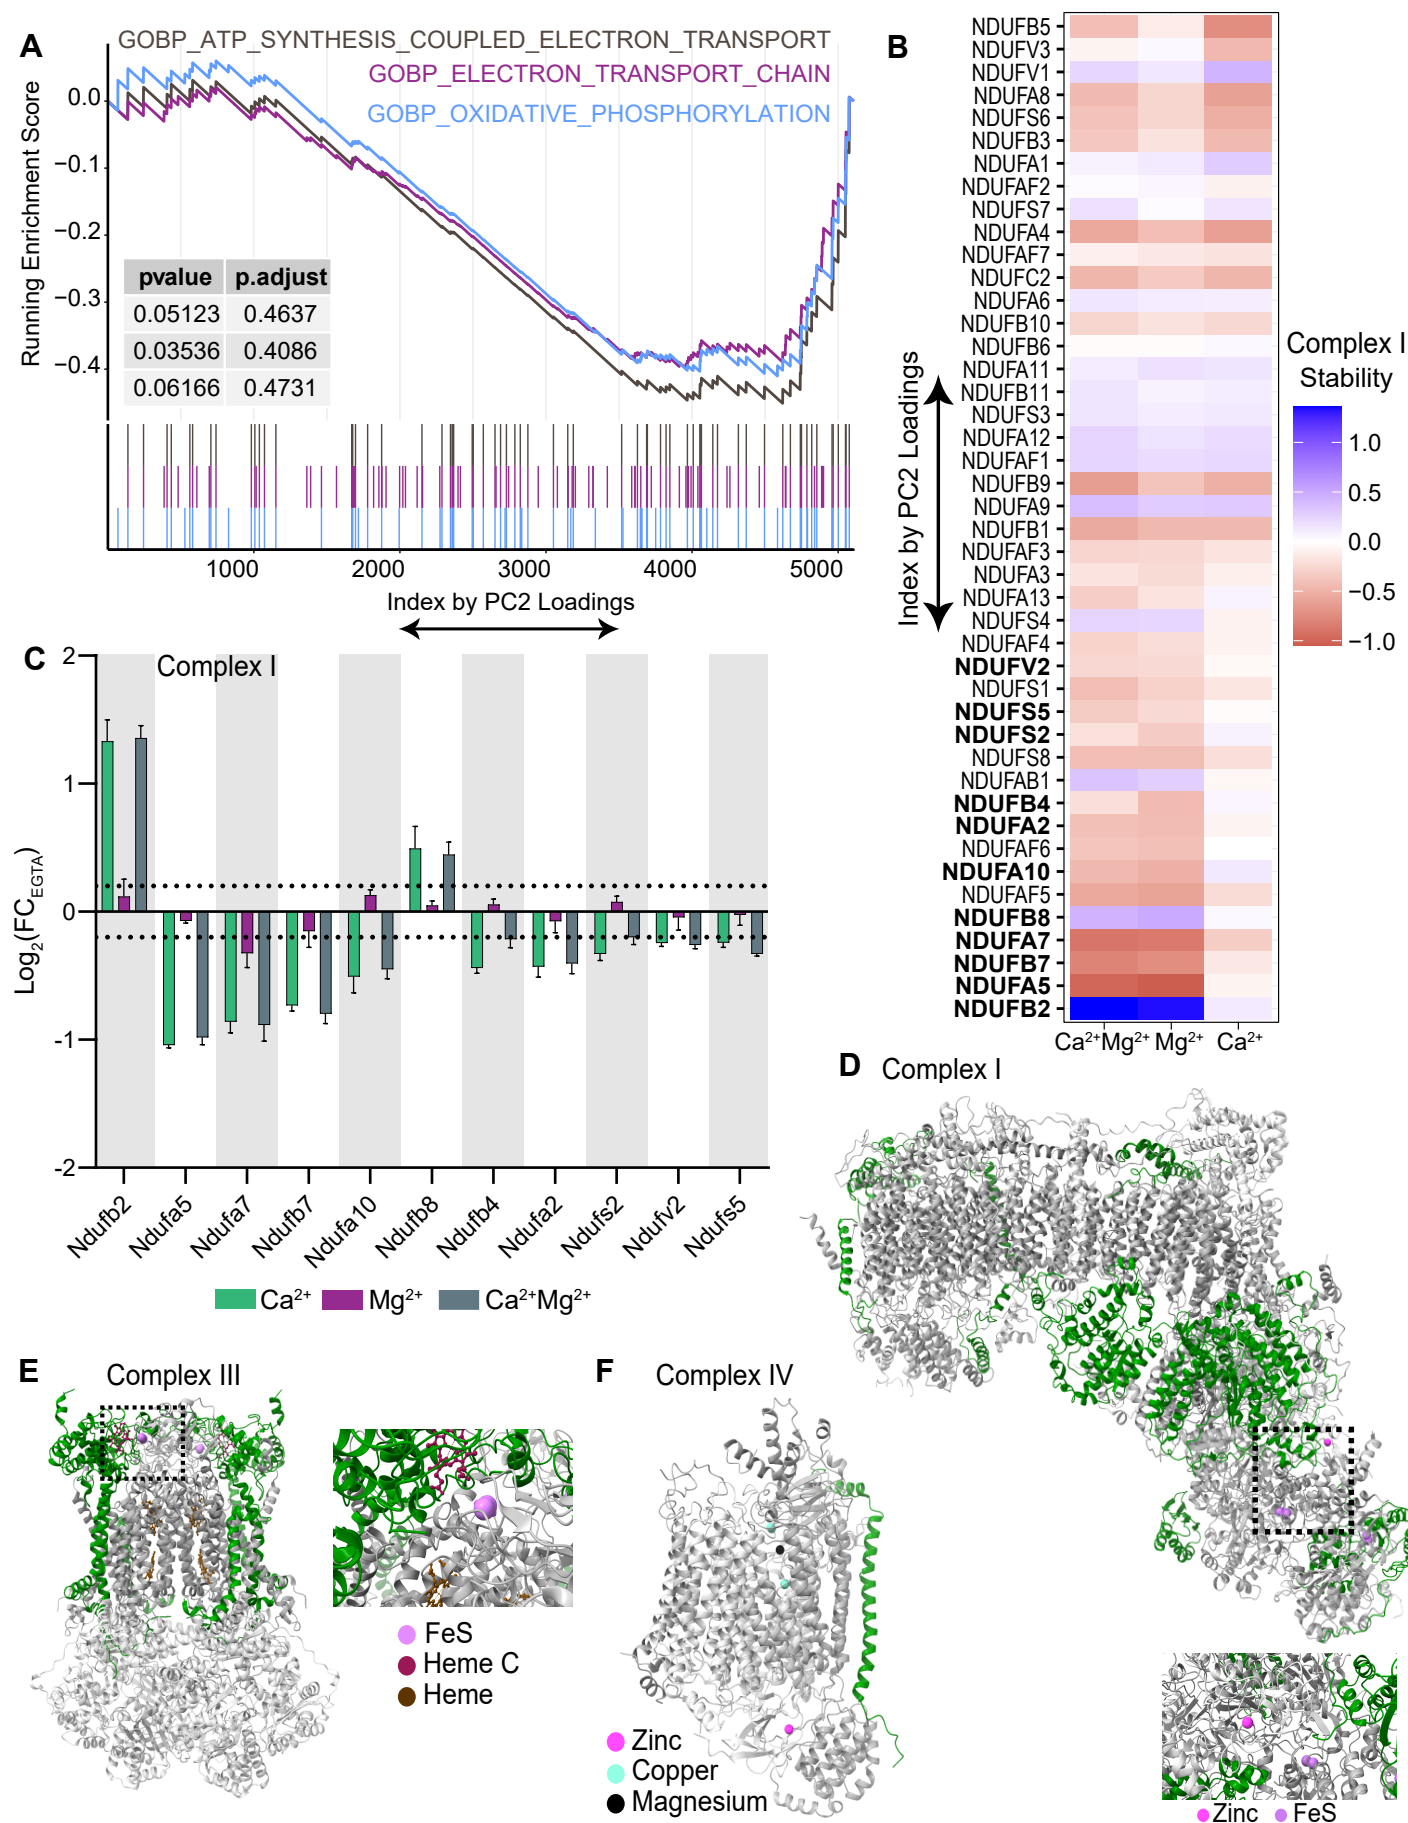

Supplement: NIHPP2024.01.18.575273v4-supplement-2.pdf [file NIHPP2024.01.18.575273v4-supplement-2.pdf]
